# Supplementary material for: Bromate removal in water through electrochemical reduction using Magnéli phase titanium oxide electrode
Source: Royal Society of Chemistry journal article supplement (doi:10.1039/d5ra01013f), 2025-01-01
Supplement: d5ra01013f1.pdf [file d5ra01013f1.pdf]

## Supporting Information

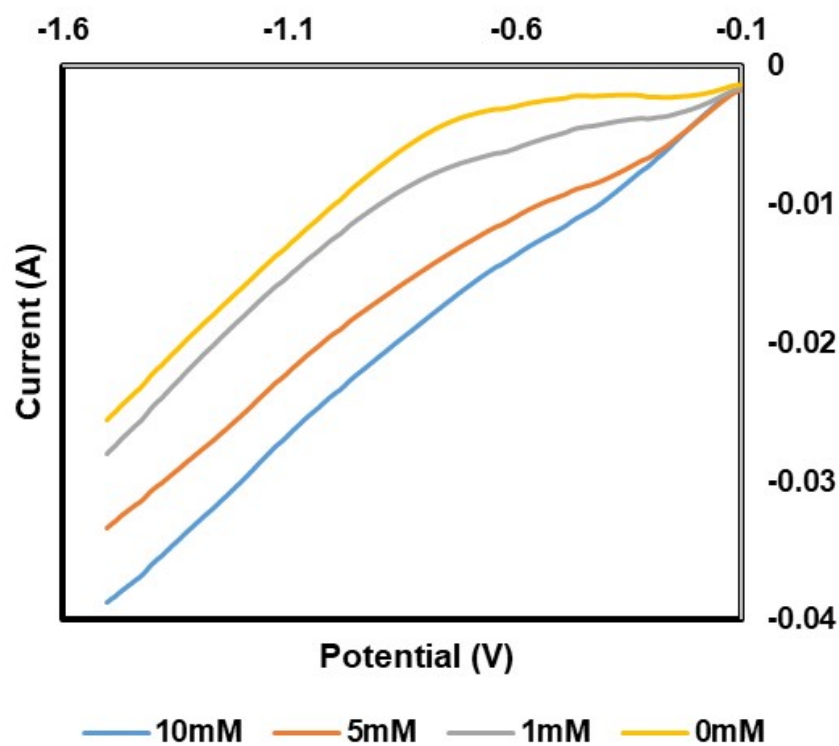

**Figure S1.** The actual non-subtracted current-potential curves and blank control used for subtraction in Figure 3a.

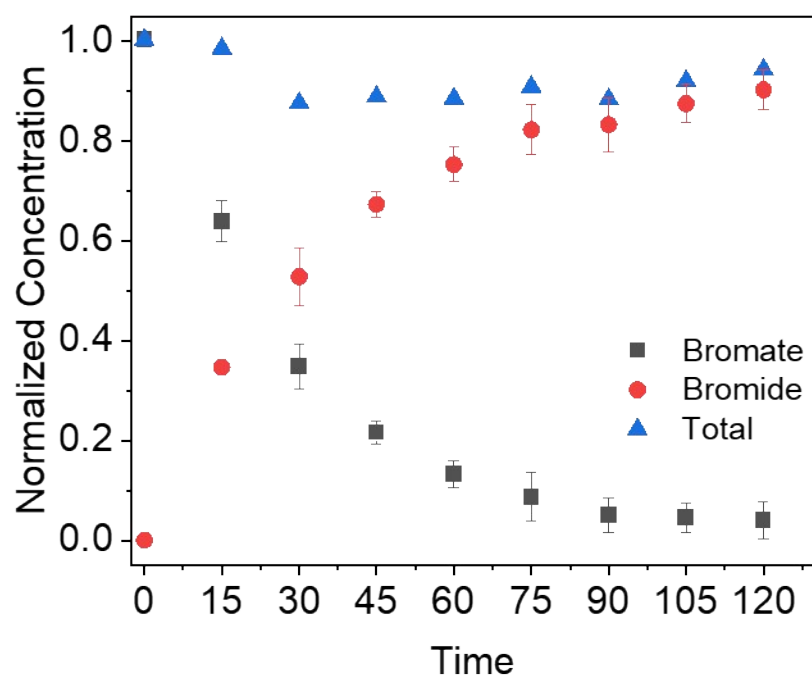

**Figure S2.** Bromide generation during the electrochemical reduction process with MP titanium oxide electrode at 3.25 V, 100 mM  $\text{NaClO}_4$  electrolyte.
